# Supplementary material for: Effects of rs2234246 with microRNA-138-5p on TREM1 mRNA expression and right hippocampal atrophy in Alzheimer’s disease
Source: Research Square preprint supplement (doi:10.21203/rs.3.rs-7694633/v1), 2025-11-02
Supplement: Supplementary file 1 [file a525476855d79c159d382bd4.docx]

Table S1. Cloned oligos and sequence primer

|  |  | Sequence |
| --- | --- | --- |
| rs223426 (G) | sense | 5’- AAAATAGCGGCCGCTAGTATCTGTAATCACCGGCTATTTCTAT-3’ |
| antisense | 5’- CTAGATAGAAATAGCCGGTGATTACAGATACTAGCGGCCGCTATTTT-3’ |
| rs223426 (A) | sense | 5’- AAAATAGCGGCCGCTAGTATCTGTAATCACCAGCTATTTCTAT-3’ |
| antisense | 5’- CTAGATAGAAATAGCTGGTGATTACAGATACTAGCGGCCGCTATTTT-3’ |
| Sequence primer | | 5’- TTACAACCGCCAAGAAGCTG-3’ |

Table S2. miRDB results for 3’- UTR sequence of TREM1 when considering rs2234246

| Target Rank | Target Score | miRNA Name | Target Rank | Target Score | miRNA Name |
| --- | --- | --- | --- | --- | --- |
| rs2234246 (G) | | | rs2234246 (A) | | |
| 1 | 85 | hsa-miR-6721-5p | 1 | 85 | hsa-miR-6721-5p |
| 2 | 79 | hsa-miR-4649-3p | 2 | 79 | hsa-miR-4649-3p |
| 3 | 73 | hsa-miR-4760-3p | 3 | 77 | hsa-miR-138-5p |
| 4 | 69 | hsa-miR-6752-3p | 4 | 73 | hsa-miR-4760-3p |
| 5 | 68 | hsa-miR-877-5p | 5 | 69 | hsa-miR-6752-3p |
| 6 | 64 | hsa-miR-185-3p | 6 | 68 | hsa-miR-877-5p |
| 7 | 62 | hsa-miR-365b-3p | 7 | 64 | hsa-miR-185-3p |
| 8 | 62 | hsa-miR-365a-3p | 8 | 62 | hsa-miR-365b-3p |
| 9 | 56 | hsa-miR-3125 | 9 | 62 | hsa-miR-365a-3p |
| 10 | 51 | hsa-miR-6504-3p | 10 | 56 | hsa-miR-3125 |
| 11 | 51 | hsa-miR-10399-5p | 11 | 51 | hsa-miR-6504-3p |
| 12 | 50 | hsa-miR-6859-5p | 12 | 51 | hsa-miR-10399-5p |
| 13 | 50 | hsa-miR-3916 | 13 | 50 | hsa-miR-6859-5p |
|  | | | 14 | 50 | hsa-miR-3916 |

UTR, untranslated region

Table S3. Correlation TREM1 protein, mRNA, miR-138-5p expressions with demographic parameters

| Parameters |  | Age | Sex | MMSE |
| --- | --- | --- | --- | --- |
| mbTREM1 protein | Control | P = 0.212, r = 0.204 | P = 0.096 | P = 0.032, r = 0.345 |
| AD | P = 0.979, r = -0.004 | P = 0.013 | P = 0.814, r = -0.039 |
| whole *TREM1* mRNA | Control | P = 0.039, r = 0.328 | P = 0.026 | P = 0.398, r = 0.137 |
| AD | P = 0.410, r = -0.136 | P = 0.404 | P = 0.165, r = 0.227 |
| mb*TREM1* mRNA | Control | P = 0.008, r = 0.414 | P = 0.645 | P = 0.767, r = 0.048 |
| AD | P = 0.295, r = -0.170 | P = 0.078 | P = 0.633, r = 0.078 |
| *TREM1sv* mRNA | Control | P = 0.069, r = 0.294 | P = 0.266 | P = 0.682, r = 0.068 |
| AD | P = 0.430, r = -0.130 | P = 0.399 | P = 0.164, r = 0.227 |
| miR-138-5p | Control | P = 0.749, r = 0.056 | P = 0.378 | P = 0.270, r = -0.184 |
| AD | P = 0.447, r = 0.125 | P = 0.024 | P = 0.279, r = 0.178 |

AD, Alzheimer’s disease; MMSE, Mini-Mental State Examination

Table S4. Multiple regression analysis for hippocampus volume with rs234246 genotype

|  | Control (n=181) | | | | AD (n=53) | | | |
| --- | --- | --- | --- | --- | --- | --- | --- | --- |
| Parameters | Left hippocampus | | Right hippocampus | | Left hippocampus | | Right hippocampus | |
|  | β | P-value | β | P-value | β | P-value | β | P-value |
| Age | -0.663 | < 0.001 | -0.630 | < 0.001 | -0.017 | 0.920 | -0.203 | 0.182 |
| Sex | -0.066 | 0.427 | -0.058 | 0.512 | -0.049 | 0.840 | 0.013 | 0.950 |
| BMI | -0.101 | 0.046 | -0.036 | 0.505 | -0.057 | 0.740 | -0.075 | 0.622 |
| Education | 0.044 | 0.427 | 0.051 | 0.391 | -0.266 | 0.083 | -0.116 | 0.386 |
| Hypertension | -0.022 | 0.661 | -0.103 | 0.055 | 0.084 | 0.593 | 0.178 | 0.202 |
| Diabetes Mellitus | -0.006 | 0.912 | -0.044 | 0.414 | 0.179 | 0.287 | 0.211 | 0.160 |
| Serum total cholesterol | 0.017 | 0.752 | 0.011 | 0.854 | -0.056 | 0.742 | -0.181 | 0.234 |
| History of brain attack | -0.064 | 0.209 | 0.015 | 0.776 | 0.205 | 0.237 | 0.094 | 0.537 |
| Current smoker | -0.041 | 0.440 | -0.021 | 0.715 | 0.290 | 0.114 | 0.250 | 0.124 |
| Current drinker | -0.011 | 0.864 | 0.001 | 0.992 | 0.230 | 0.162 | 0.222 | 0.129 |
| Chronic kidney disease | 0.012 | 0.820 | -0.002 | 0.974 | -0.110 | 0.526 | -0.083 | 0.588 |
| Regular exercise | -0.061 | 0.229 | 0.010 | 0.859 | -0.166 | 0.353 | -0.184 | 0.246 |
| ECG abnormalities | -0.106 | 0.039 | -0.153 | 0.005 | -0.202 | 0.236 | -0.070 | 0.640 |
| MMSE | 0.066 | 0.211 | 0.094 | 0.097 | 0.477 | 0.008 | 0.404 | 0.011 |
| eTIV | 0.219 | 0.003 | 0.141 | 0.066 | -0.079 | 0.753 | -0.074 | 0.941 |
| rs223426 (G/G: G/A: A/A) | -0.014 | 0.779 | -0.082 | 0.127 | -0.011 | 0.946 | -0.387 | 0.010 |

BMI, body mass index; ECG, Electrocardiogram; eTIV, estimated total intracranial volume; MMSE, Mini-Mental State Examination

Table S5. Multiple regression analysis for hippocampus volume with rs234246 dominant model

|  | Control (n=181) | | | | AD (n=53) | | | |
| --- | --- | --- | --- | --- | --- | --- | --- | --- |
| Parameters | Left hippocampus | | Right hippocampus | | Left hippocampus | | Right hippocampus | |
|  | β | P-value | β | P-value | β | P-value | β | P-value |
| Age | -0.662 | < 0.001 | -0.629 | < 0.001 | -0.032 | 0.851 | -0.192 | 0.235 |
| Sex | -0.065 | 0.439 | -0.051 | 0.563 | -0.041 | 0.866 | 0.077 | 0.728 |
| BMI | -0.103 | 0.042 | -0.044 | 0.417 | -0.078 | 0.646 | -0.125 | 0.428 |
| Education | 0.043 | 0.435 | 0.054 | 0.363 | -0.264 | 0.084 | -0.104 | 0.454 |
| Hypertension | -0.023 | 0.645 | -0.107 | 0.048 | 0.069 | 0.660 | 0.165 | 0.260 |
| Diabetes Mellitus | -0.006 | 0.912 | -0.047 | 0.385 | 0.187 | 0.273 | 0.170 | 0.281 |
| Serum total cholesterol | 0.017 | 0.751 | 0.011 | 0.852 | -0.060 | 0.720 | -0.224 | 0.156 |
| History of brain attack | -0.064 | 0.205 | 0.013 | 0.808 | 0.212 | 0.212 | 0.146 | 0.352 |
| Current smoker | -0.741 | 0.460 | -0.018 | 0.758 | 0.276 | 0.140 | 0.269 | 0.121 |
| Current drinker | -0.010 | 0.880 | 0.002 | 0.972 | 0.225 | 0.174 | 0.268 | 0.083 |
| Chronic kidney disease | 0.012 | 0.815 | -0.002 | 0.975 | -0.104 | 0.552 | -0.114 | 0.480 |
| Regular exercise | -0.062 | 0.226 | 0.007 | 0.903 | -0.161 | 0.367 | -0.175 | 0.291 |
| ECG abnormalities | -0.107 | 0.038 | -0.156 | 0.004 | -0.185 | 0.281 | -0.063 | 0.690 |
| MMSE | 0.069 | 0.196 | 0.095 | 0.094 | 0.474 | 0.008 | 0.377 | 0.021 |
| eTIV | 0.220 | 0.002 | 0.147 | 0.054 | -0.074 | 0.767 | -0.025 | 0.913 |
| rs223426 (G/G: G/A + A/A) | -0.027 | 0.593 | -0.088 | 0.098 | 0.042 | 0.791 | -0.304 | 0.046 |

BMI, body mass index; ECG, Electrocardiogram; eTIV, estimated total intracranial volume; MMSE, Mini-Mental State Examination


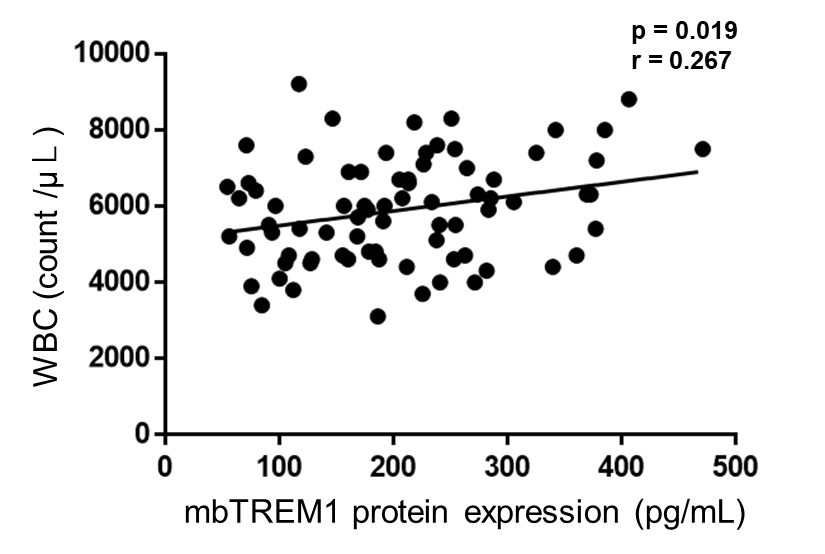


Figure S1. The correlation between mbTREM1 protein expression and WBC counts.


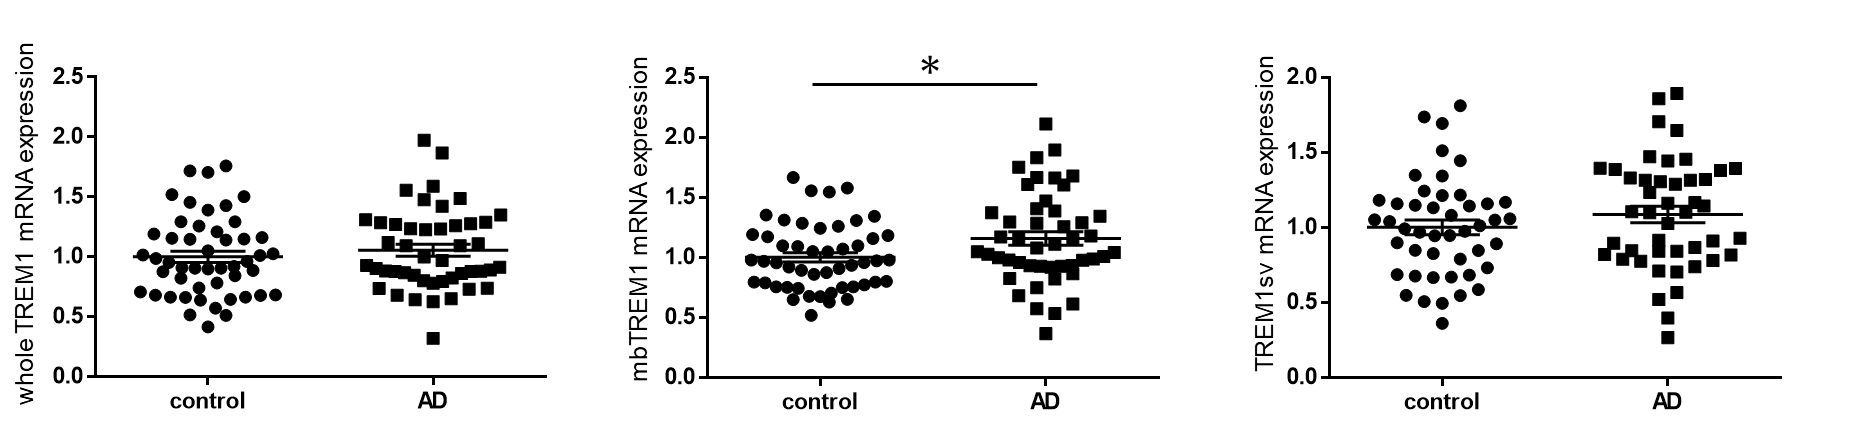


Figure S2. Whole *TREM1*, *mbTREM1*, and *TREM1sv* expressions in control and AD subjects of our previous study.
